# Supplementary material
Source: PubMed Central journal article supplement (PMC10443733)

## Supplementary figure 1

a.

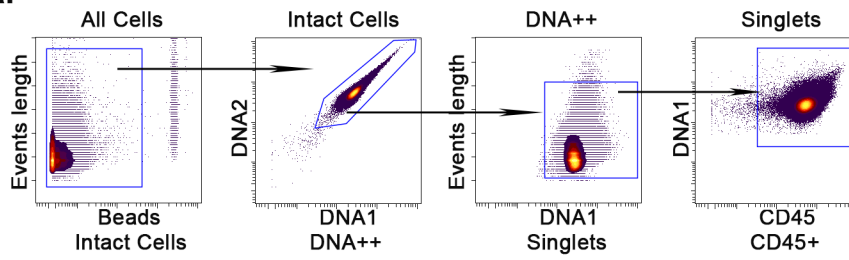

Supplement: NIHMS1909086-supplement-Figure_S1.pdf [file NIHMS1909086-supplement-Figure_S1.pdf]

## Supplementary figure 2

a.

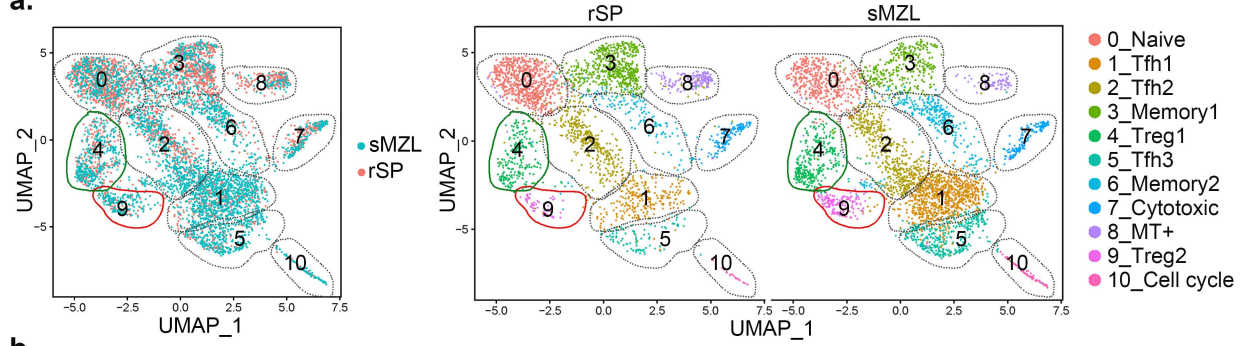

b.

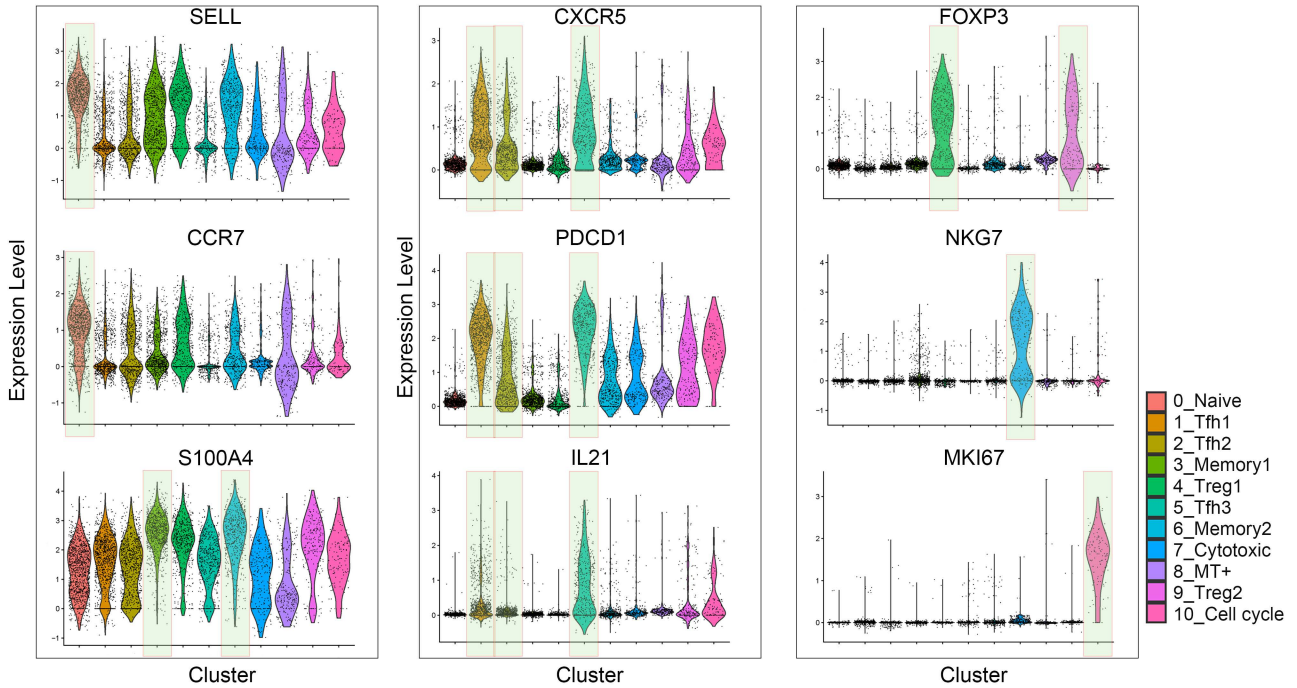

c.

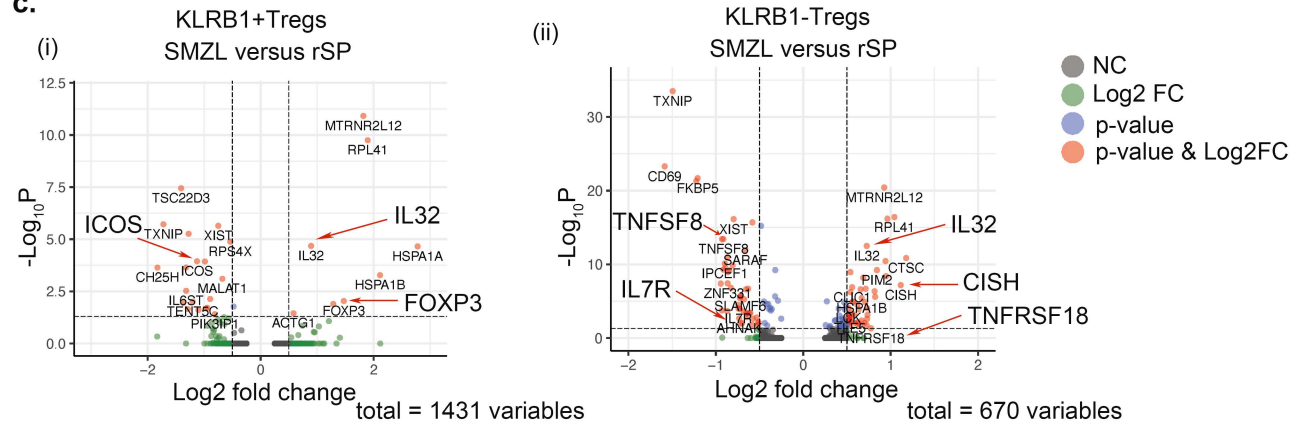

Supplement: NIHMS1909086-supplement-Figure_S2.pdf [file NIHMS1909086-supplement-Figure_S2.pdf]

### Supplementary figure 3

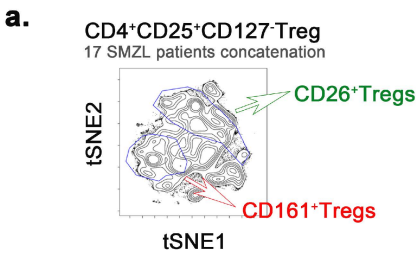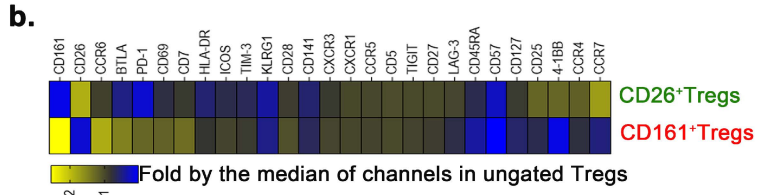

Supplement: NIHMS1909086-supplement-Figure_S3.pdf [file NIHMS1909086-supplement-Figure_S3.pdf]

### Supplementary figure 4

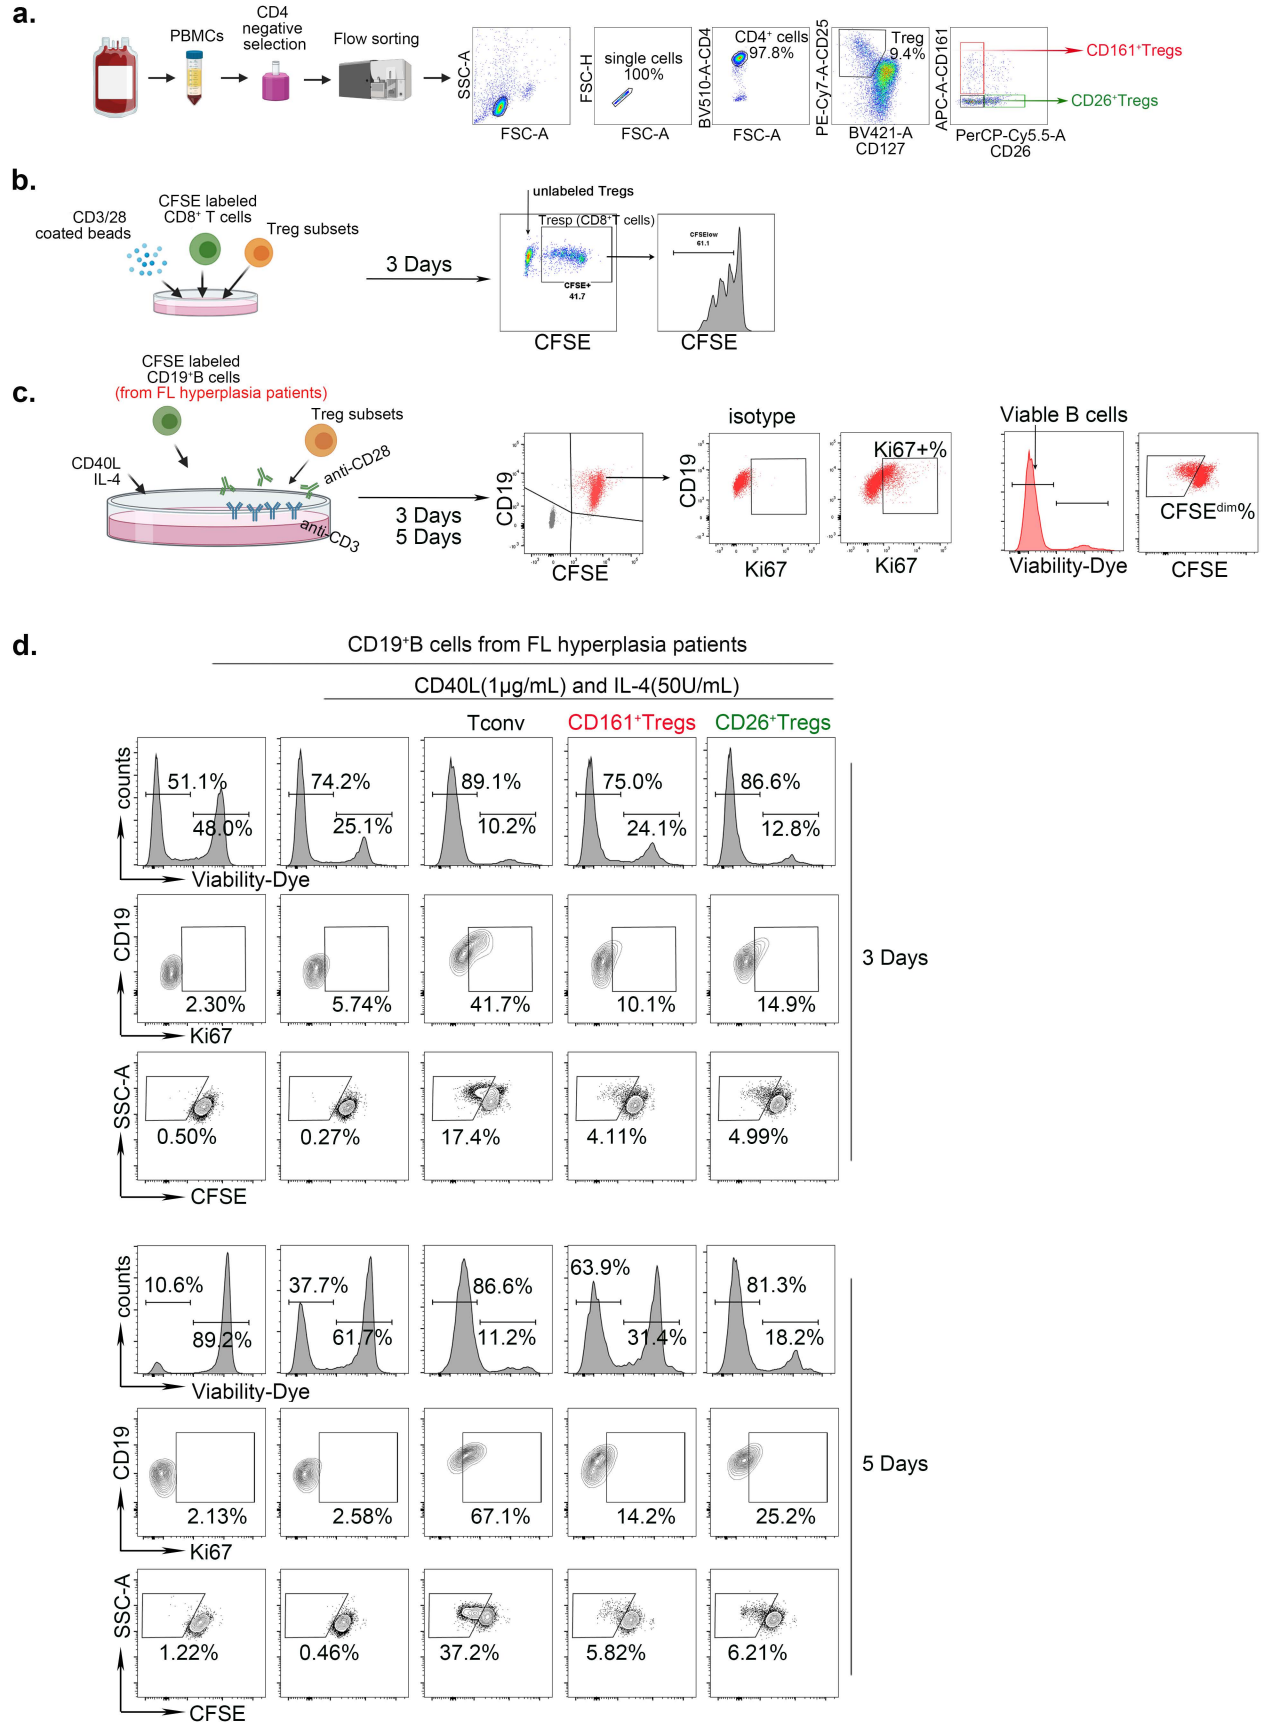

Supplement: NIHMS1909086-supplement-Figure_S4.pdf [file NIHMS1909086-supplement-Figure_S4.pdf]

**Supplementary figure 5**

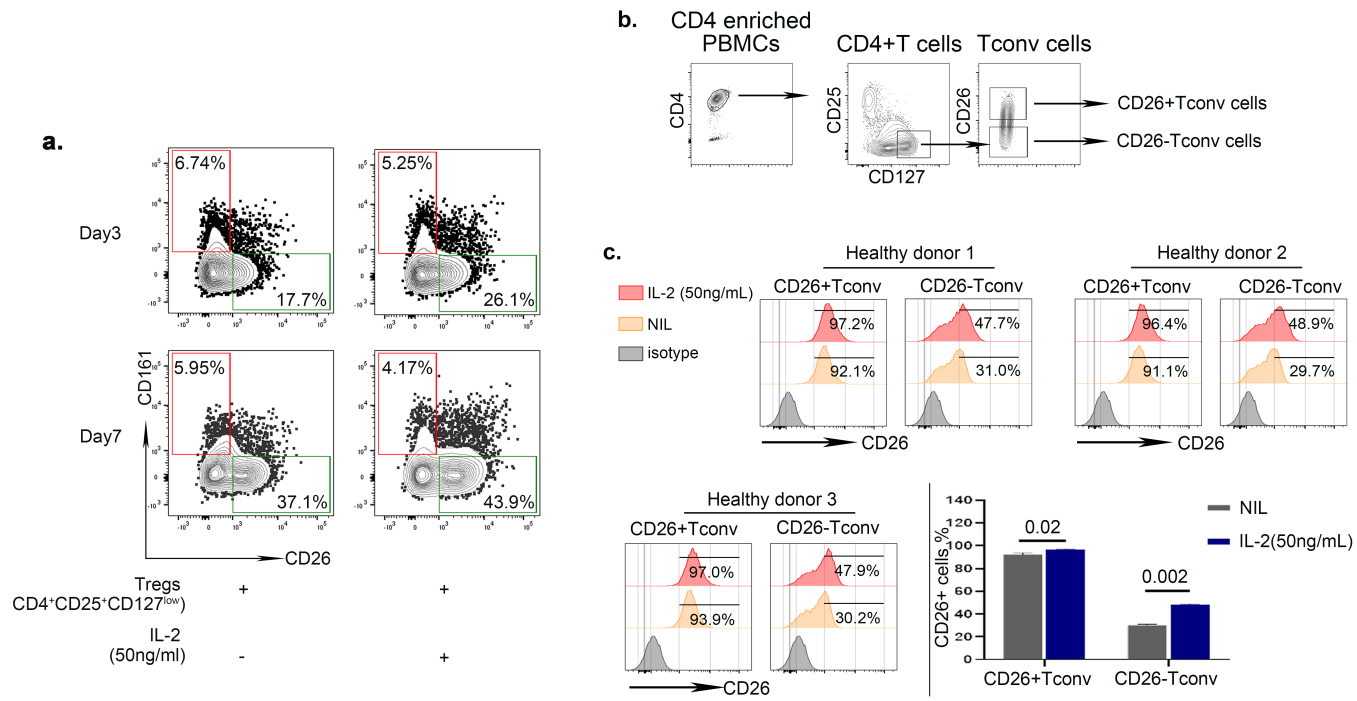

Supplement: NIHMS1909086-supplement-Figure_S5.pdf [file NIHMS1909086-supplement-Figure_S5.pdf]

**Supplementary figure 6**

**a.**

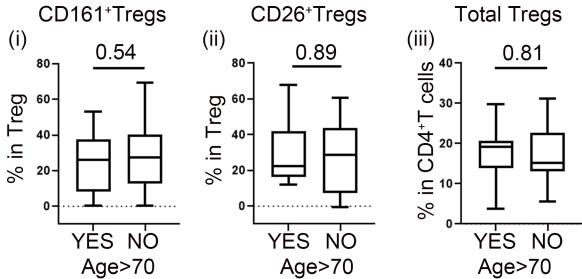

**b.**

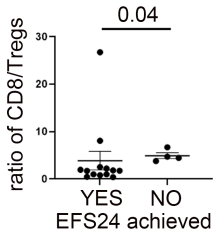

Supplement: NIHMS1909086-supplement-Figure_S6.pdf [file NIHMS1909086-supplement-Figure_S6.pdf]
